# Supplementary material
Source: ML conference proceedings conference paper supplement (https://proceedings.neurips.cc/paper_files/paper/2019/hash/060fd70a06ead2e1079d27612b84aff4-Abstract.html)
Supplement: Supplementary file [file 060fd70a06ead2e1079d27612b84aff4-Supplemental.zip]

## A Supplementary material

### A.1 Proofs

#### A.1.1 Proof of Proposition 2.1

*Proof.* Observe that the dynamics in (1) can be rewritten as

$$\begin{aligned} x_{t+1} &= Ax_t + Bu_t + w_t = x_t^\top \otimes I_{n_x} \text{vec}(A) + u_t^\top \otimes I_{n_x} \text{vec}(B) + w_t \\ &= \underbrace{[x_t^\top \ u_t^\top]}_{\Phi_t} \otimes I_{n_x} \text{vec}([A \ B]) + w_t \\ &= \Phi_t \theta + w_t. \end{aligned}$$

By Bayes' rule, the posterior distribution over parameters can be written as

$$p(\theta | \mathcal{D}_n) = \frac{1}{p(\mathcal{D}_n)} p(\mathcal{D}_n | \theta) p(\theta) \propto p(\mathcal{D}_n | \theta), \quad (18)$$

where proportionality follows from the assumption of a uniform prior,  $p(\theta) \propto 1$ . As  $w_t \sim \mathcal{N}(0, \sigma_w^2 I)$  the likelihood can be expressed as

$$\begin{aligned} p(\mathcal{D}_n | \theta) &= \prod_{t=1}^{n-1} p(x_{t+1} | x_t, u_t) \propto \exp \left( -\frac{1}{2\sigma_w^2} \sum_{t=1}^{n-1} |x_{t+1} - \Phi_t \theta|^2 \right) = \\ &\exp \left( -\frac{1}{2\sigma_w^2} \sum_{t=1}^{n-1} x_{t+1}^\top x_{t+1} - 2x_{t+1}^\top \Phi_t \theta + \theta^\top \Phi_t^\top \Phi_t \theta \right) \propto \exp \left( -\frac{1}{2} |\theta - \mu_\theta|_{\Sigma_\theta}^{-1} \right) \end{aligned}$$

which has the norm of the Gaussian distribution  $\mathcal{N}(\mu_\theta, \Sigma_\theta)$ . From (18), we know that the posterior is proportional to the likelihood; therefore the posterior is given by  $\mathcal{N}(\mu_\theta, \Sigma_\theta)$ .  $\square$

#### A.1.2 Proof of Lemma 3.1

*Proof.* As  $\theta = \text{vec}([A \ B])$  and  $\mu_\theta = \text{vec}([\hat{A} \ \hat{B}])$  we have  $\theta - \mu_\theta = \text{vec}(X^\top)$ . Substituting this representation of  $\theta - \mu_\theta$  into (2) we have, w.p.  $1 - \delta$ ,

$$1 \geq \text{vec}(X^\top)^\top \left( \frac{1}{\sigma_w^2 c_\delta} \sum_{t=1}^{n-1} \begin{bmatrix} x_t \\ u_t \end{bmatrix} \begin{bmatrix} x_t \\ u_t \end{bmatrix}^\top \otimes I_{n_x} \right) \text{vec}(X^\top) \quad (19a)$$

$$= \text{tr}(XX^\top D) \quad (19b)$$

$$= \text{tr}(X^\top DX) \quad (19c)$$

$$\geq \lambda_{\max}(X^\top DX), \quad (19d)$$

where (19a) is attained by dividing (2) by  $c_\delta = \chi_{n_x^2 + n_x n_u}^2(\delta)$ ; (19b) follows by combining the matrix identities

$$\text{tr} A^\top B = \text{vec}(A)^\top \text{vec}(B) \quad (20)$$

c.f., [36, Equation 521], and

$$\text{vec}(CEF) = (F \otimes C) \text{vec}(E) \quad (21)$$

c.f., [36, Equation 520] to get

$$\text{tr} XX^\top D = \text{vec}(X^\top)^\top (D \otimes I) \text{vec}(X^\top), \quad (22)$$

by choosing  $A = X^\top$ ,  $B = X^\top D$ ,  $C = I$ ,  $E = X^\top$  and  $F = D^\top = D$ ; (19c) is simply the cyclic trace property; (19d) follows from the fact that the Frobenius norm upper bounds the spectral norm (2-norm) of a matrix. As  $\lambda_{\max}(X^\top DX) \leq 1 \implies X^\top DX \preceq I$ , this completes this proof.  $\square$

#### A.1.3 Proof of Lemma 4.1

*Proof.* The worst-case cost  $J_\infty(\mathcal{K}, \mathcal{M})$  is given by

$$\min_{W \in \mathbb{S}_{++}^{n_x}} \text{tr} \left( \begin{bmatrix} Q & 0 \\ 0 & R \end{bmatrix} \begin{bmatrix} W & WK^\top \\ KW & KWK^\top + \Sigma \end{bmatrix} \right), \text{ s.t. (11) holds for } A = A_{wc}, B = B_{wc}, \quad (23)$$

where  $A_{wc}$  and  $B_{wc}$  are the ‘worst-case’  $A$  and  $B$ , respectively, within  $\Theta_m(\mathcal{M})$ , as defined in (6).

The approximate cost  $\tilde{J}_\infty(\mathcal{K}, \mathcal{M})$  is given by

$$\min_{W \in \mathbb{S}_{++}^{n_x}} \text{tr} \left( \begin{bmatrix} Q & 0 \\ 0 & R \end{bmatrix} \begin{bmatrix} W & WK^\top \\ KW & KWK^\top + \Sigma \end{bmatrix} \right), \text{ s.t. (11) holds } \forall \{A, B\} \in \Theta_m(\mathcal{M}). \quad (24)$$

As the feasible set in (24) is a subset of the feasible set in (23), the cost of (24) cannot be less than that of (23). Therefore,  $\tilde{J}_\infty(\mathcal{K}, \mathcal{M}) \geq J_\infty(\mathcal{K}, \mathcal{M})$ . □

#### A.1.4 Proof of Theorem 4.2

*Proof.* As Theorem 4.1 is non-conservative (i.e. if and only if),  $\min_{\mathcal{K}} \tilde{J}_\infty(\mathcal{K}, \Theta_m(\mathcal{M}))$  is equivalent to solving

$$\min_{\lambda, W \succeq 0, K, \Sigma \succeq 0} \text{tr}(\text{blkdiag}(Q, R)\bar{\Sigma}), \text{ s.t. } S(\lambda, \bar{\Sigma}, \hat{A}, \hat{B}, D) \succeq 0, \lambda \geq 0 \quad (25)$$

where

$$\bar{\Sigma} := \begin{bmatrix} W & WK^\top \\ KW & KWK^\top + \Sigma \end{bmatrix}.$$

When we solve the convex SDP (15) in Theorem 4.2, we solve with  $\Xi \succeq 0$ , as a free variable, instead of  $\bar{\Sigma}$ , i.e., we ignore the structural constraints implicit in  $\bar{\Sigma}$ . As we remove constraints from the problem, the SDP (15) has a solution that is at least as good as the solution to (25) (which is the optimal solution).

However, as we enforce  $\Xi \succeq 0$ , one can recover a feasible policy  $K = Z^\top W^{-1}$  and  $\Sigma = Y - Z^\top W^{-1}Z = Y - KWK^\top$ , as the Schur complement implies

$$\Xi \succeq 0 \iff Y \succeq Z^\top W^{-1}Z \iff \Sigma := Y - KWK^\top \succeq 0. \quad (26)$$

Therefore, as the policy from the SDP (15) in Theorem 4.2 is: i) at least as good as the optimal policy, and ii) feasible, it must be equivalent to the optimal policy. □

## A.2 Description of hardware in the loop experiment

For the hardware-in-the-loop experiment described in §5, we consider a system comprised of two subsystems: i. a Quanser QUBE-Servo 2 physical (i.e. real-world) servomechanism, cf. Figure 4, and ii. a synthetic (i.e. simulated) LTI system of the form (1), with parameters

$$A_{syn} = \begin{bmatrix} 0.95 & 0.5 & 0 & 0 & 0 \\ 0 & 0.95 & 0.5 & 0 & 0 \\ 0 & 0 & 0.95 & 0 & 1 \\ 0 & 0 & 0 & -0.9 & 0.5 \\ 0 & 0 & 0 & 0.8 & -0.9 \end{bmatrix}, \quad B_{syn} = \begin{bmatrix} 0 \\ 0 \\ 0 \\ 0 \\ 1 \end{bmatrix}.$$

For the purpose of implementation in MATLAB Simulink, we set  $C_{syn} = I_{5 \times 5}$  and  $D_{syn} = 0_{5 \times 6}$  so as to output the full state  $x_t$ . The two subsystems are interconnected as depicted in the Simulink block diagram shown in Figure 5. The coupling between these two systems, cf. Figure 5, is  $C_{coup} = \begin{bmatrix} 0.1 & 0 & 0 & 0 & 0 \end{bmatrix}$ . Data was sampled from the physical system at 500 Hz, i.e., a sampling time of  $T_s = 0.002$ , and the position (measured directly via an encoder) was passed through a high-pass filter to obtain velocity estimates. Band-limited white noise (of unit power) was added to all states of the system, as shown in Figure 5. The gain for each ‘noise channel’ was set to  $\sqrt{T_s} \times 10^{-3}$ .

The experiment consisted of five trials, each comprising the following procedure. Initial data  $\mathcal{D}_0$  was generated by simulating the system for 0.5 seconds, i.e. 250 samples at 500 Hz, under feedback control with the policy  $\mathcal{K} = \{K, \Sigma\}$  given by

$$K = \begin{bmatrix} 2.1847 & 0.7384 & 0.0756 & 0.0625 & 0.0355 & -0.0087 & 0.0217 \\ -0.0062 & 0.0006 & 0.0789 & 0.3477 & 0.6417 & 1.7401 & -0.9099 \end{bmatrix}, \quad \Sigma = \sqrt{T_s} \times 10^{-3} I_{2 \times 2}.$$

We then applied the methods `rr1` and `greedy`, as defined in §5. The matrices specifying the cost function were given by  $Q = \text{diag}(1, 0.1, 0.1, 0.1, 0.1, 10, 0.1)$  and  $R = \text{diag}(0.1, 0.1)$ . The total time horizon was  $T = 1250$ , i.e. 2.5 seconds at 500 Hz, which was divided into  $N = 5$  equal intervals.

In Figure 6 we decompose the total cost plotted in Figure ??(d) into the costs associated with the physical system and the synthetic (simulated) system.

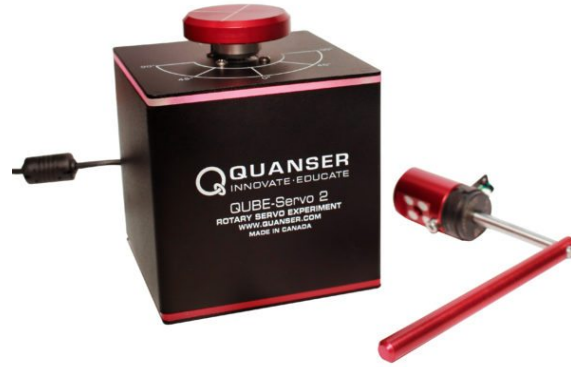

Figure 4: The Quanser QUBE-Servo 2. Photo: [www.quanser.com/products/qube-servo-2](http://www.quanser.com/products/qube-servo-2).

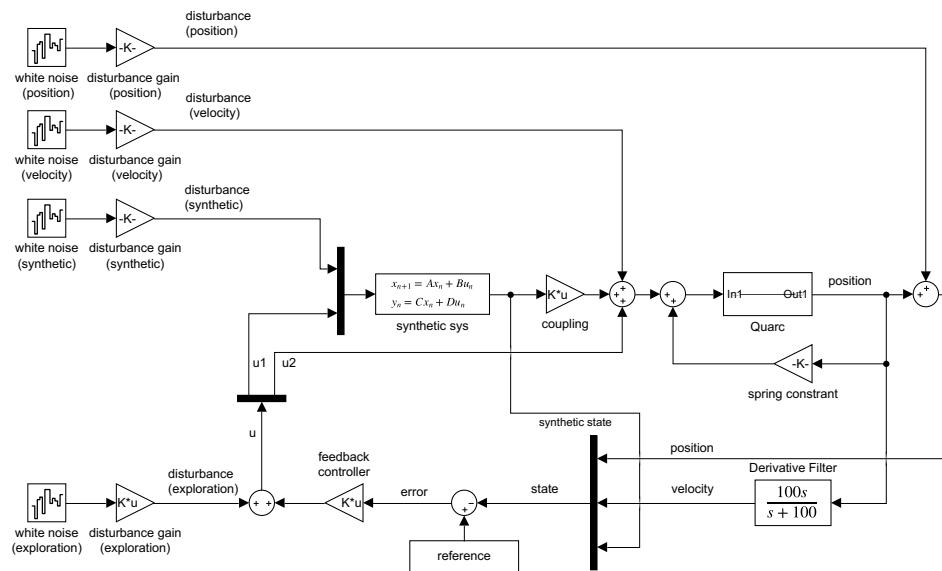

Figure 5: Simulink block diagram showing the interconnection of the physical system (Quarc) and the synthetic (simulated) system.

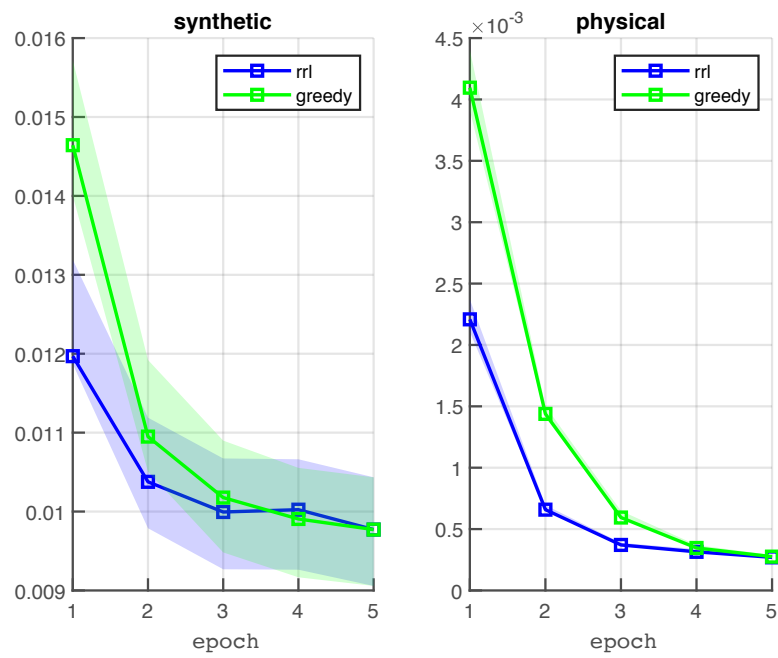

Figure 6: The (median) cost of `rr1` and `greedy` controllers on the synthetic system and the physical system. The shaded region covers the best and worst costs at each epoch.
